# Supplementary material for: The electrocatalytic hydrogen evolution reaction using a heteroatom-doped hollow onion-like fullerene across a wide pH range
Source: Royal Society of Chemistry journal article supplement (doi:10.1039/d5nr03492b), 2025-01-01
Supplement: d5nr03492b1.pdf [file d5nr03492b1.pdf]

## Supporting Information

### **Electrocatalytic Hydrogen Evolution Reaction using Heteroatom doped *hollow-Onion Like Fullerene* Ring in a Wide *pH* Range**

Isha Mehta,<sup>a</sup> Anubha Rajput,<sup>b</sup> Purva Yewale,<sup>a</sup> Biswarup Chakraborty,<sup>\*b</sup> and Sagarika Bhattacharya<sup>\*a</sup>

## Table of Content

| S.No. | Section                                                                                                                                                                                                                                                                                                                                                                                                                                                                                       | Page No. |
|-------|-----------------------------------------------------------------------------------------------------------------------------------------------------------------------------------------------------------------------------------------------------------------------------------------------------------------------------------------------------------------------------------------------------------------------------------------------------------------------------------------------|----------|
| 1.    | EDX spectrum of elements C, N, O, and S present on the surface of the as synthesized <i>h-OLF</i> .                                                                                                                                                                                                                                                                                                                                                                                           | S-3      |
| 2.    | Percentage elemental composition of elements present on the surface of the synthesized <i>h-OLF</i> deposited on NF.                                                                                                                                                                                                                                                                                                                                                                          | S-3      |
| 3.    | CV curves in 0.3 N HCl in MeCN (containing 0.05 M TBAP) solution. CV curves are non-iR corrected and scan rate 5 mV s <sup>-1</sup> .                                                                                                                                                                                                                                                                                                                                                         | S-3      |
| 4.    | The LSV curves with mass variation of catalyst in 0.3 N HCl in MeCN (containing 0.05 M TBAP) solution. CV curves are non-iR corrected and scan rate 1 mV s <sup>-1</sup> .                                                                                                                                                                                                                                                                                                                    | S-4      |
| 5.    | Concentration dependent LSV polarization curves for the HER with <i>h-OLF</i> /NF (non-iR corr, scan rate 1mV s <sup>-1</sup> ) in Sulphate buffer in MeCN (0.05 M TBAP) solution.                                                                                                                                                                                                                                                                                                            | S-4      |
| 6.    | LSV polarization curves with different solvents of MeCN+ TBAP, Sulphate buffer, PTSA, and AcOH.                                                                                                                                                                                                                                                                                                                                                                                               | S-5      |
| 7.    | The comparative LSV curve of the HER activity of <i>h-OLF</i> /NF and Pt.                                                                                                                                                                                                                                                                                                                                                                                                                     | S-5      |
| 8.    | The Nyquist curves of <i>h-OLF</i> /NF in different electrolyte media and corresponding circuit fitting. The inset shows the equivalent circuit fitting ( $R_u = R_s$ = solvent resistance; $R_p = R_{ct}$ = charge transfer resistance; $C_f = C_{dl}$ = double layer capacitance).                                                                                                                                                                                                          | S-6      |
| 9.    | ECSA analysis from the CV scans in a non-Faradaic potential range of <i>h-OLF</i> /NF in MeCN (containing 0.05 M TBAP) solution in presence of <b>(a)</b> 0.1 N HCl, <b>(b)</b> 0.1 M AcOH, <b>(c)</b> 9:2 ratio of 0.05 M TBAP in MeCN and sulphate buffer, <b>(d)</b> 0.1 M PTSA, and <b>(e)</b> 0.05 M TBAP in MeCN. CV cycles are recorded at scan rate of 25 mV s <sup>-1</sup> , 50 mV s <sup>-1</sup> , 100 mV s <sup>-1</sup> , 150 mV s <sup>-1</sup> , and 200 mV s <sup>-1</sup> . | S-6      |
| 10.   | The chronoamperometry study of <i>h-OLF</i> /NF in MeCN (containing 0.05 M TBAP) solution in presence of 0.1 N HCl. The break in the CA curve indicates the time of addition of HCl to maintain the electrolyte concentration of 0.1 N HCl.                                                                                                                                                                                                                                                   | S-7      |
| 11.   | EDX spectrum of elements C, N, O, and S present on the surface of the <i>h-OLF</i> /NF after electrocatalysis.                                                                                                                                                                                                                                                                                                                                                                                | S-7      |
| 12.   | Ratio of the elements present on the surface of the catalyst showing the decrement in the concentration of the elements of the functional groups on the surface of <i>h-OLF</i> /NF after electrolysis in 0.1 N HCl.                                                                                                                                                                                                                                                                          | S-7      |

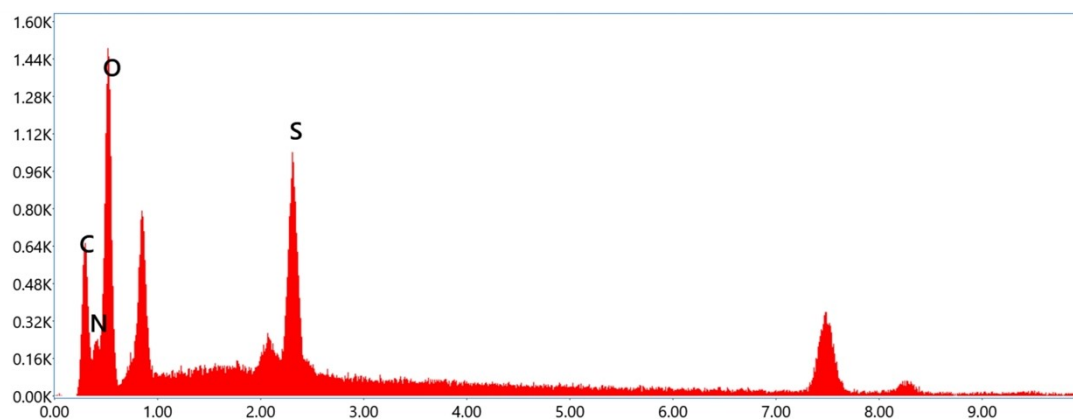

**Figure S1.** EDX spectrum of elements C, N, O, and S present on the surface of the as synthesized *h*-OLF deposited on NF.

**Table S1.** Percentage elemental composition of elements present on the surface of the as synthesized *h*-OLF deposited on NF before electrocatalysis.

| S.No. | Elements on <i>h</i> -OLF | Percentage composition of elements in <i>h</i> -OLF/NF before electrocatalysis (in %) |
|-------|---------------------------|---------------------------------------------------------------------------------------|
| 1.    | C                         | 59.47                                                                                 |
| 2.    | O                         | 34.88                                                                                 |
| 3.    | S                         | 3.35                                                                                  |
| 4.    | N                         | 2.31                                                                                  |
| Total |                           | 100.00                                                                                |

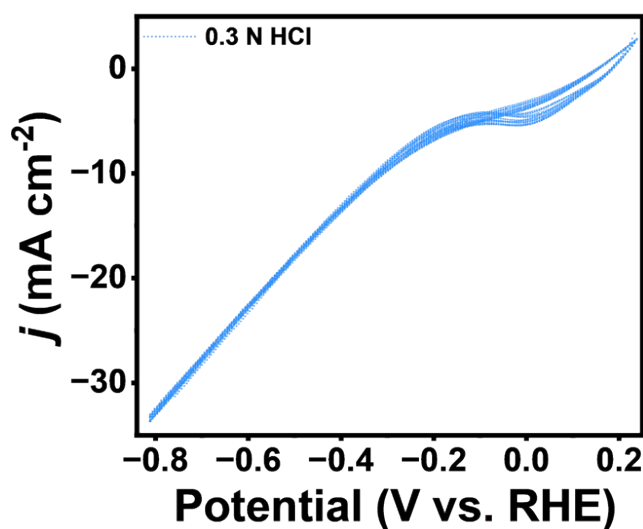

**Figure S2.** CV curves in 0.3 N HCl in MEACN (containing 0.05 M TBAP) solution. CV curves are non-iR corrected and scan rate 5 mV s<sup>-1</sup>

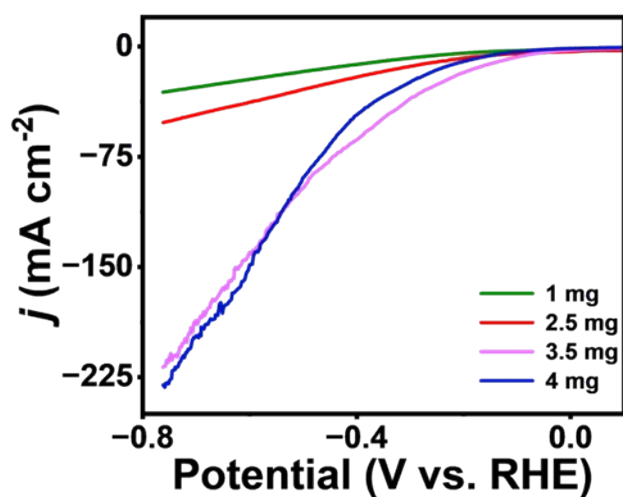

**Figure S3.** The LSV curves with mass variation of catalyst in 0.3 N HCl in MeCN (containing 0.05 M TBAP) solution. CV curves are non-iR corrected and scan rate 1 mV s<sup>-1</sup>.

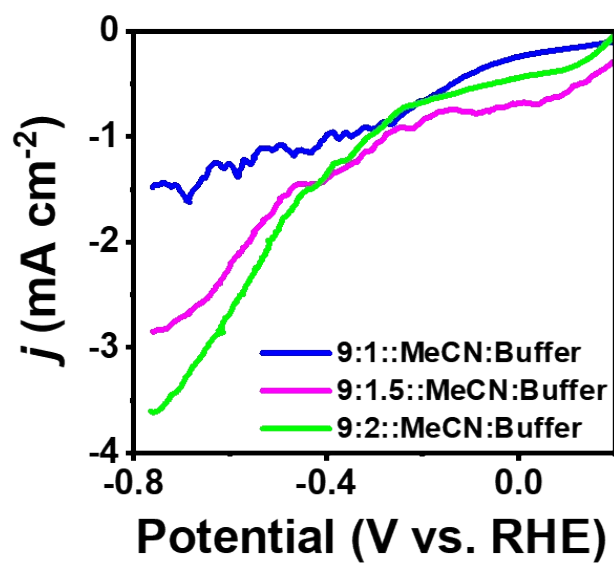

**Figure S4.** Concentration dependent LSV polarization curves for the HER with *h*-OLF/NF (non-iR corr, scan rate 1 mV s<sup>-1</sup>) in Sulphate buffer in MeCN (0.05 M TBAP) solution.

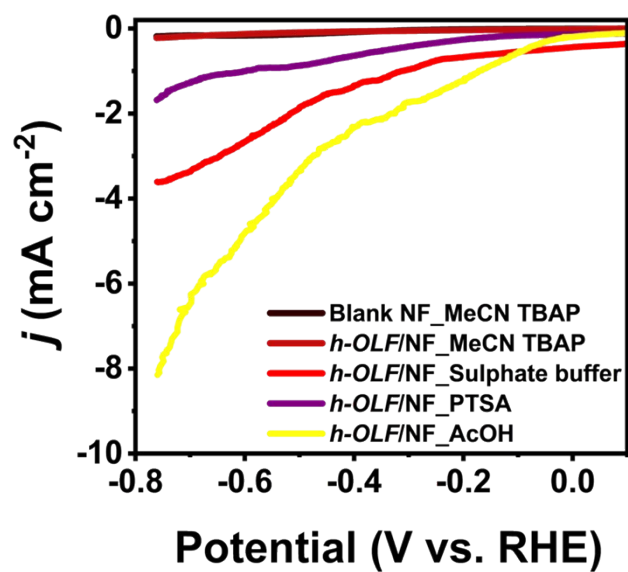

Figure S5. LSV polarization curves with different solvents of MeCN + TBAP, Sulphate buffer, PTSA, and AcOH.

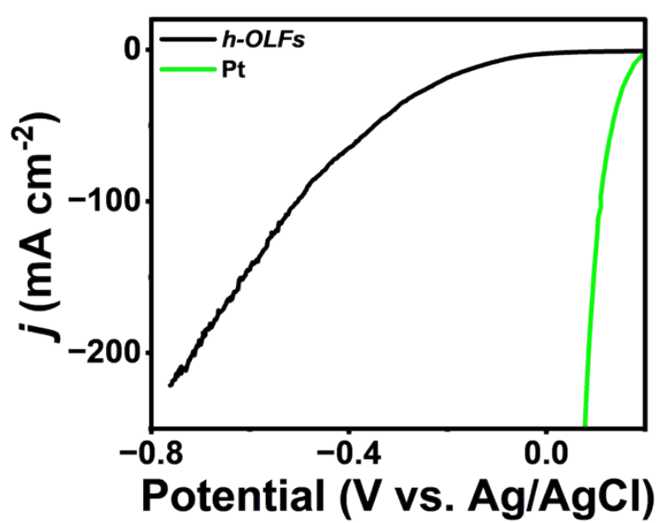

Figure S6. The comparative LSV curve of the HER activity of  $h\text{-OLF/NF}$  and Pt.

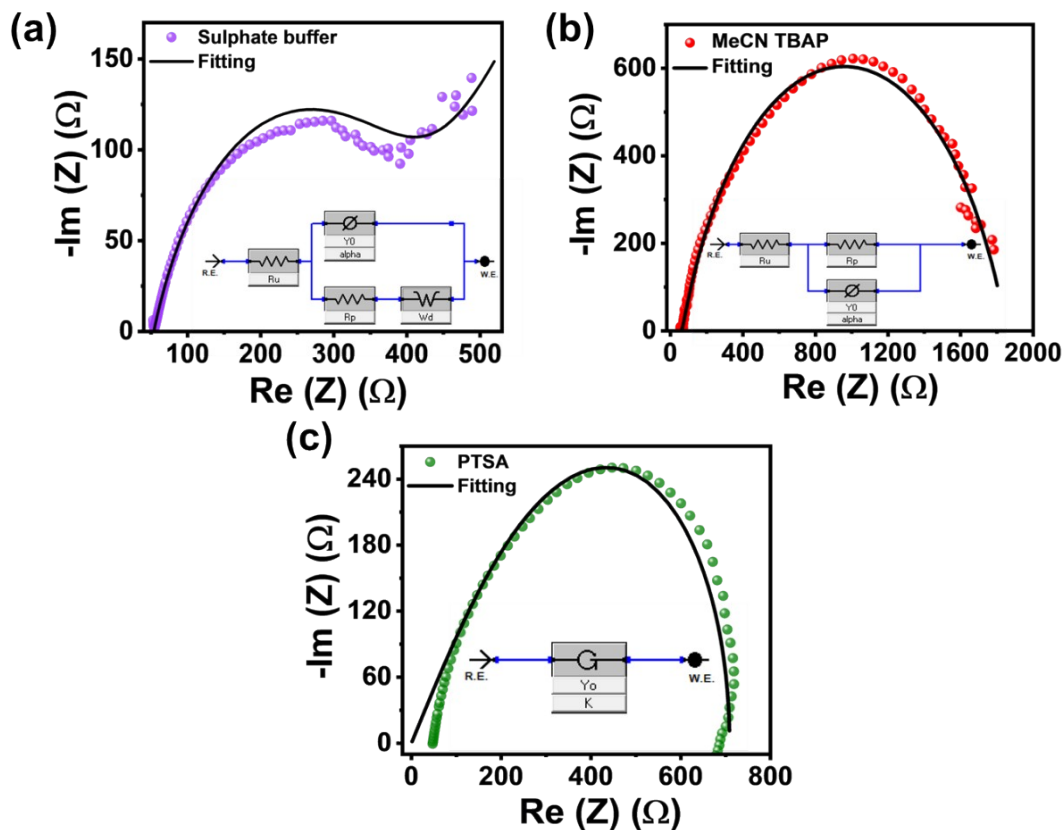

**Figure S7.** The Nyquist curves of  $h\text{-OLF/NF}$  in different electrolyte media and corresponding circuit fitting. The inset shows the equivalent circuit fitting ( $R_u = R_s$  = solvent resistance;  $R_p = R_{ct}$  = charge transfer resistance;  $C_f = C_{dl}$  = double layer capacitance).

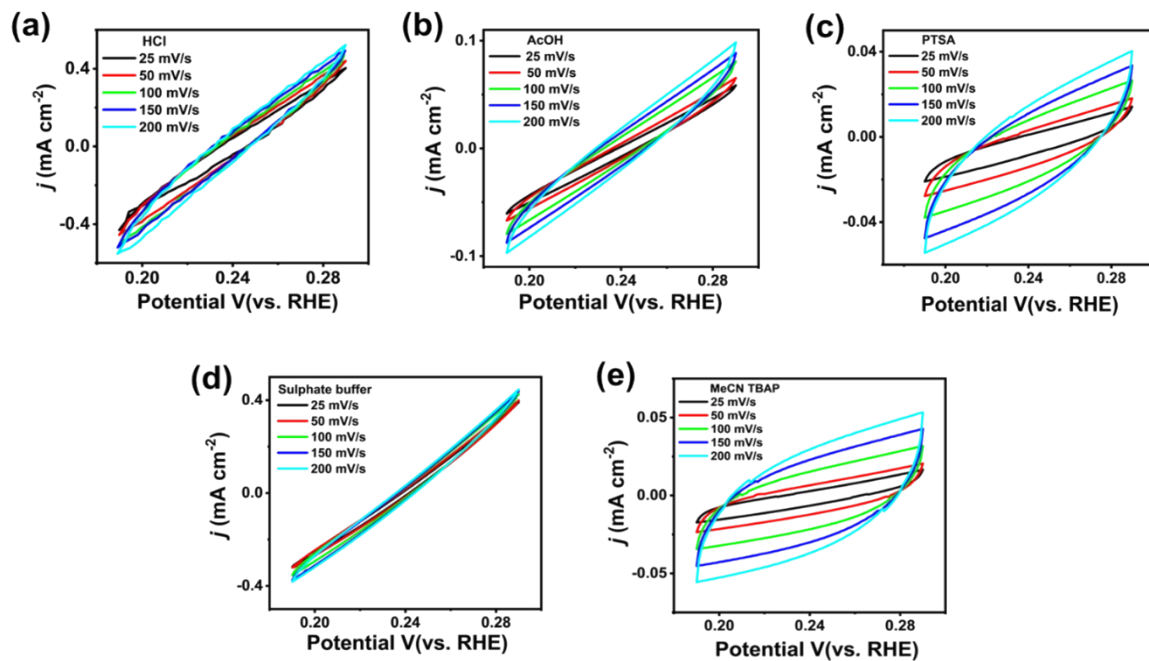

**Figure S8.** ECSA analysis from the CV scans in a non-Faradaic potential range of  $h\text{-OLF/NF}$  in MeCN (containing 0.05 M TBAP) solution in presence of (a) 0.1 N HCl, (b) 0.1 M AcOH, (c) 9:2 ratio of 0.05 M TBAP in MeCN and sulphate buffer, (d) 0.1 M PTSA, and (e) 0.05 M TBAP in MeCN. CV cycles are recorded at scan rate of 25  $\text{mV s}^{-1}$ , 50  $\text{mV s}^{-1}$ , 100  $\text{mV s}^{-1}$ , 150  $\text{mV s}^{-1}$ , and 200  $\text{mV s}^{-1}$ .

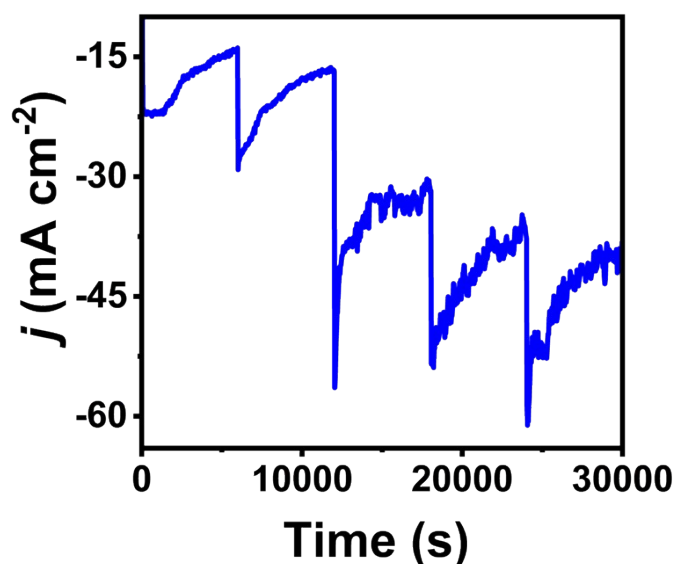

**Figure S9.** The chronoamperometry study of *h-OLF/NF* in MeCN (containing 0.05 M TBAP) solution in presence of 0.1 N HCl. The break in the CA curve indicates the time of addition of HCl to maintain the electrolyte concentration of 0.1 N HCl.

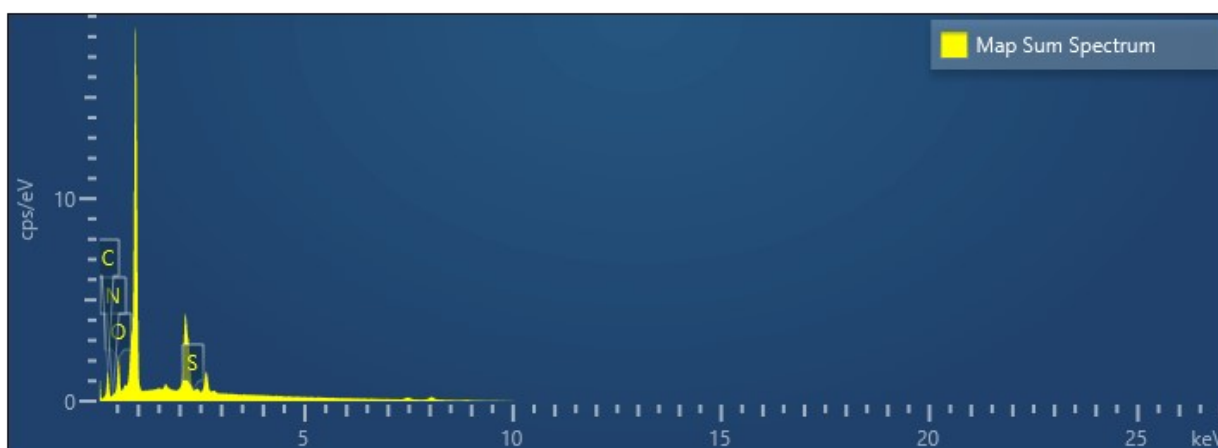

**Figure S10.** EDX spectrum of elements C, N, O, and S present on the surface of the *h-OLF/NF* after electrocatalysis. The presence of Ni and Cu in the EDX spectra of the post-catalytic sample is accounted for by the usage of Nickel foam as electrode support and the copper tape as a conductive connection, respectively. During long-term electrocatalysis, Ni and Cu leached out, owing to their corrosion in an acidic medium.

**Table S2.** Ratio of the elements present on the surface of the catalyst shows the decrement in the concentration of the elements of the functional groups on the surface of *h-OLF/NF* after electrolysis in 0.1 N HCl.

| S.No. | Elements in <i>h-OLF/NF</i> | Percentage composition of elements in <i>h-OLF/NF</i> after electrocatalysis (in %) |
|-------|-----------------------------|-------------------------------------------------------------------------------------|
| 1.    | C                           | 56.98                                                                               |
| 2.    | O                           | 38.69                                                                               |
| 3.    | S                           | 1.77                                                                                |
| 4.    | N                           | 2.56                                                                                |
| Total |                             | 100.00                                                                              |
